# Supplementary material for: A Bi2WO6/Ag2S/ZnS Z-scheme heterojunction photocatalyst with enhanced visible-light photoactivity towards the degradation of multiple dye pollutants
Source: Royal Society of Chemistry journal article supplement (doi:10.1039/c9ra05372g), 2019-01-01
Supplement: c9ra05372g1.pdf [file c9ra05372g1.pdf]

***Bi<sub>2</sub>WO<sub>6</sub>/Ag<sub>2</sub>S/ZnS Z-scheme heterojunction photocatalyst with enhanced visible-light photoactivity towards multiple dye pollutants degradation***

***Soleiman Mosleh<sup>a</sup>, Kheibar Dashtian<sup>b</sup>, Mehrorang Ghaedi<sup>b\*</sup>, Maryam Amiri<sup>b</sup>***

*<sup>a</sup> Department of Gas and Petroleum, Yasouj University, Gachsaran 75918-74831, Iran*

*<sup>b</sup> Chemistry Department, Yasouj University, Yasouj 75918-74831, Iran, Tel. /fax: +98-74-33223048*

*Corresponding author:*

*\*E-Mail: m\_ghaedi@yu.ac.ir*

**Table S1.** Experimental factors and levels in the central composite design.

| Factor | Name                 | Units | Minimum | Maximum | Coded | Values       | Mean            |       |                 |
|--------|----------------------|-------|---------|---------|-------|--------------|-----------------|-------|-----------------|
| A      | pH                   | -     | 3.00    | 9.00    | 4.50  | 7.50         | 6.06            |       |                 |
| B      | Photocatalyst dosage | g/L   | 0.008   | 0.016   | 0.010 | 0.014        | 0.012           |       |                 |
| C      | Irradiation Time     | min   | 60.00   | 120.00  | 75.00 | 105.00       | 90.58           |       |                 |
| D      | Concentration of MG  | mg/L  | 4.00    | 12.00   | 6.00  | 10.00        | 8.080           |       |                 |
| E      | Concentration of AO  | mg/L  | 2.00    | 6.00    | 3.00  | 5.00         | 4.04            |       |                 |
| Run    | A                    | B     | C       | D       | E     | Actual R% MG | Predicted R% MG | R% AO | Predicted R% AO |
| 1      | 6.0                  | 0.008 | 90      | 8       | 4     | 61.10        | 60.86           | 49.21 | 48.94           |
| 2      | 6.0                  | 0.016 | 90      | 8       | 4     | 86.79        | 86.55           | 80.94 | 80.67           |
| 3      | 6.0                  | 0.012 | 90      | 12      | 4     | 51.17        | 50.93           | 50.73 | 50.46           |
| 4      | 4.5                  | 0.014 | 105     | 6       | 5     | 79.31        | 79.47           | 76.62 | 76.80           |
| 5      | 7.5                  | 0.014 | 105     | 6       | 3     | 66.90        | 67.06           | 99.55 | 99.73           |
| 6      | 9.0                  | 0.012 | 90      | 8       | 4     | 83.18        | 82.94           | 73.42 | 73.15           |
| 7      | 4.5                  | 0.010 | 105     | 10      | 5     | 32.62        | 32.78           | 46.41 | 46.59           |
| 8      | 6.0                  | 0.012 | 90      | 8       | 2     | 86.98        | 86.74           | 74.43 | 74.16           |
| 9      | 6.0                  | 0.012 | 90      | 8       | 4     | 74.24        | 73.70           | 65.57 | 65.66           |
| 10     | 4.5                  | 0.014 | 75      | 10      | 5     | 82.83        | 82.99           | 51.69 | 51.87           |
| 11     | 6.0                  | 0.012 | 60      | 8       | 4     | 66.01        | 65.77           | 54.49 | 54.22           |
| 12     | 3.0                  | 0.012 | 90      | 8       | 4     | 73.71        | 73.47           | 65.73 | 65.46           |
| 13     | 6.0                  | 0.012 | 90      | 8       | 4     | 73.44        | 73.70           | 65.07 | 65.66           |
| 14     | 6.0                  | 0.012 | 90      | 8       | 4     | 73.44        | 73.70           | 65.79 | 65.66           |
| 15     | 4.5                  | 0.014 | 105     | 10      | 3     | 96.08        | 96.24           | 71.63 | 71.81           |
| 16     | 6.0                  | 0.012 | 90      | 4       | 4     | 95.71        | 95.47           | 79.41 | 79.14           |
| 17     | 6.0                  | 0.012 | 90      | 8       | 4     | 73.44        | 73.70           | 66.07 | 65.66           |
| 18     | 4.5                  | 0.010 | 75      | 6       | 3     | 81.10        | 81.42           | 59.52 | 59.88           |
| 19     | 6.0                  | 0.012 | 90      | 8       | 6     | 59.91        | 59.67           | 55.72 | 55.45           |
| 20     | 7.5                  | 0.010 | 75      | 10      | 5     | 72.68        | 72.84           | 44.17 | 44.35           |
| 21     | 6.0                  | 0.012 | 120     | 8       | 4     | 80.87        | 80.63           | 75.66 | 75.39           |
| 22     | 7.5                  | 0.014 | 75      | 10      | 3     | 54.11        | 54.27           | 69.4  | 69.58           |
| 23     | 7.5                  | 0.014 | 75      | 6       | 5     | 97.51        | 97.67           | 74.38 | 74.56           |
| 24     | 6.0                  | 0.012 | 90      | 8       | 4     | 73.44        | 73.70           | 65.27 | 65.66           |
| 25     | 7.5                  | 0.010 | 105     | 10      | 3     | 71.62        | 71.78           | 64.12 | 64.30           |
| 26     | 7.5                  | 0.010 | 105     | 6       | 5     | 75.41        | 75.57           | 69.1  | 69.28           |

**Table S2.** Sequential Model Sum of Squares for MG degradation.

| <b>R% MG</b>                           |                       |                  |                           |                            |                            |           |
|----------------------------------------|-----------------------|------------------|---------------------------|----------------------------|----------------------------|-----------|
| <b>Sequential Model Sum of Squares</b> |                       |                  |                           |                            |                            |           |
| <b>Source</b>                          | <b>Sum of Squares</b> | <b>df</b>        | <b>Mean Square</b>        | <b>F Value</b>             | <b>p-value Prob &gt; F</b> |           |
| Mean vs Total                          | 1.423E+005            | 1                | 1.423E+005                |                            |                            |           |
| Linear vs Mean                         | 2110.11               | 5                | 422.02                    | 2.69                       | 0.0515                     |           |
| 2FI vs Linear                          | 3098.73               | 10               | 309.87                    | 73.90                      | < 0.0001                   |           |
| Quadratic vs 2FI                       | 40.46                 | 5                | 8.09                      | 27.42                      | 0.0012                     | Suggested |
| Cubic vs Quadratic                     | 0.96                  | 1                | 0.96                      | 7.53                       | 0.0517                     | Aliased   |
| Residual                               | 0.51                  | 4                | 0.13                      |                            |                            |           |
| Total                                  | 1.476E+005            | 26               | 5675.68                   |                            |                            |           |
| <b>Lack of Fit Tests</b>               |                       |                  |                           |                            |                            |           |
| <b>Source</b>                          | <b>Sum of Squares</b> | <b>df</b>        | <b>Mean Square</b>        | <b>F Value</b>             | <b>p-value Prob &gt; F</b> |           |
| Linear                                 | 3140.15               | 16               | 196.26                    | 1533.28                    | < 0.0001                   |           |
| 2FI                                    | 41.42                 | 6                | 6.90                      | 53.93                      | 0.0009                     |           |
| Quadratic                              | 0.96                  | 1                | 0.96                      | 7.53                       | 0.0517                     | Suggested |
| Cubic                                  | 0.000                 | 0                |                           |                            |                            | Aliased   |
| Pure Error                             | 0.51                  | 4                | 0.13                      |                            |                            |           |
| <b>Model Summary Statistics</b>        |                       |                  |                           |                            |                            |           |
| <b>Source</b>                          | <b>Std. Dev.</b>      | <b>R-Squared</b> | <b>Adjusted R-Squared</b> | <b>Predicted R-Squared</b> | <b>PRESS</b>               |           |
| Linear                                 | 12.53                 | 0.4019           | 0.2523                    | -0.1621                    | 6101.94                    |           |
| 2FI                                    | 2.05                  | 0.9920           | 0.9800                    | 0.9636                     | 191.13                     |           |
| Quadratic                              | 0.54                  | 0.9997           | 0.9986                    | 0.8966                     | 543.16                     | Suggested |
| Cubic                                  | 0.36                  | 0.9999           | 0.9994                    |                            | +                          | Aliased   |

**Table S3.** Sequential Model Sum of Squares for AO degradation.

| <b>R% AO</b>                           |                       |                  |                           |                            |                            |           |
|----------------------------------------|-----------------------|------------------|---------------------------|----------------------------|----------------------------|-----------|
| <b>Sequential Model Sum of Squares</b> |                       |                  |                           |                            |                            |           |
| <b>Source</b>                          | <b>Sum of Squares</b> | <b>df</b>        | <b>Mean Square</b>        | <b>F Value</b>             | <b>p-value Prob &gt; F</b> |           |
| Mean vs Total                          | 1.130E+005            | 1                | 1.130E+005                |                            |                            |           |
| Linear vs Mean                         | 3765.24               | 5                | 753.05                    | 179.04                     | < 0.0001                   |           |
| 2FI vs Linear                          | 49.84                 | 10               | 4.98                      | 1.45                       | 0.2826                     |           |
| Quadratic vs 2FI                       | 32.43                 | 5                | 6.49                      | 17.45                      | 0.0035                     | Suggested |
| Cubic vs Quadratic                     | 1.22                  | 1                | 1.22                      | 7.66                       | 0.0504                     | Aliased   |
| Residual                               | 0.64                  | 4                | 0.16                      |                            |                            |           |
| Total                                  | 1.169E+005            | 26               | 4494.41                   |                            |                            |           |
| <b>Lack of Fit Tests</b>               |                       |                  |                           |                            |                            |           |
| <b>Source</b>                          | <b>Sum of Squares</b> | <b>df</b>        | <b>Mean Square</b>        | <b>F Value</b>             | <b>p-value Prob &gt; F</b> |           |
| Linear                                 | 83.49                 | 16               | 5.22                      | 32.76                      | 0.0020                     |           |
| 2FI                                    | 33.65                 | 6                | 5.61                      | 35.21                      | 0.0020                     |           |
| Quadratic                              | 1.22                  | 1                | 1.22                      | 7.66                       | 0.0504                     | Suggested |
| Cubic                                  | 0.000                 | 0                |                           |                            |                            | Aliased   |
| Pure Error                             | 0.64                  | 4                | 0.16                      |                            |                            |           |
| <b>Model Summary Statistics</b>        |                       |                  |                           |                            |                            |           |
| <b>Source</b>                          | <b>Std. Dev.</b>      | <b>R-Squared</b> | <b>Adjusted R-Squared</b> | <b>Predicted R-Squared</b> | <b>PRESS</b>               |           |
| Linear                                 | 2.05                  | 0.9781           | 0.9727                    | 0.9583                     | 160.40                     |           |
| 2FI                                    | 1.85                  | 0.9911           | 0.9777                    | 0.9187                     | 312.95                     |           |
| Quadratic                              | 0.61                  | 0.9995           | 0.9976                    | 0.8212                     | 688.15                     | Suggested |
| Cubic                                  | 0.40                  | 0.9998           | 0.9990                    |                            | +                          | Aliased   |

**Table S4.** Analysis of variance (ANOVA) results for quadratic model of degradation process.

| Source                | df | R% of MG       |             |            |                  |         | R% of          |             |
|-----------------------|----|----------------|-------------|------------|------------------|---------|----------------|-------------|
|                       |    | Sum of Squares | Mean Square | F Value    | p-value Prob > F |         | Sum of Squares | Mean Square |
| Model                 | 20 | 5249.30        | 262.47      | 889.35     | < 0.0001         | 3847.51 | 192.38         |             |
| <i>A</i>              | 1  | 44.84          | 44.84       | 151.94     | < 0.0001         | 29.57   | 29.57          |             |
| <i>B</i>              | 1  | 329.99         | 329.99      | 1118.15    | < 0.0001         | 503.40  | 503.40         |             |
| <i>C</i>              | 1  | 110.41         | 110.41      | 374.12     | < 0.0001         | 224.08  | 224.08         |             |
| <i>D</i>              | 1  | 991.91         | 991.91      | 3361.04    | < 0.0001         | 411.27  | 411.27         |             |
| <i>E</i>              | 1  | 366.39         | 366.39      | 1241.51    | < 0.0001         | 175.03  | 175.03         |             |
| <i>AB</i>             | 1  | 398.60         | 398.60      | 1350.66    | < 0.0001         | 13.74   | 13.74          |             |
| <i>AC</i>             | 1  | 292.16         | 292.16      | 989.97     | < 0.0001         | 13.74   | 13.74          |             |
| <i>AD</i>             | 1  | 9.65           | 9.65        | 32.69      | 0.0023           | 1.69    | 1.69           |             |
| <i>AE</i>             | 1  | 281.80         | 281.80      | 954.87     | < 0.0001         | 1.68    | 1.68           |             |
| <i>BC</i>             | 1  | 132.35         | 132.35      | 448.47     | < 0.0001         | 0.19    | 0.19           |             |
| <i>BD</i>             | 1  | 133.90         | 133.90      | 453.71     | < 0.0001         | 8.11    | 8.11           |             |
| <i>BE</i>             | 1  | 249.26         | 249.26      | 844.61     | < 0.0001         | 8.11    | 8.11           |             |
| <i>CD</i>             | 1  | 2.26           | 2.26        | 7.67       | 0.0394           | 8.11    | 8.11           |             |
| <i>CE</i>             | 1  | 156.56         | 156.56      | 530.51     | < 0.0001         | 8.11    | 8.11           |             |
| <i>DE</i>             | 1  | 230.86         | 230.86      | 782.27     | < 0.0001         | 8.14    | 8.14           |             |
| <i>A</i> <sup>2</sup> | 1  | 34.81          | 34.81       | 117.94     | 0.0001           | 22.73   | 22.73          |             |
| <i>B</i> <sup>2</sup> | 1  | 2.424E-004     | 2.424E-004  | 8.213E-004 | 0.9782           | 1.25    | 1.25           |             |
| <i>C</i> <sup>2</sup> | 1  | 0.42           | 0.42        | 1.41       | 0.2886           | 1.25    | 1.25           |             |
| <i>D</i> <sup>2</sup> | 1  | 0.42           | 0.42        | 1.41       | 0.2886           | 1.26    | 1.26           |             |
| <i>E</i> <sup>2</sup> | 1  | 0.41           | 0.41        | 1.38       | 0.2930           | 1.25    | 1.25           |             |
| Residual              | 5  | 1.48           | 0.30        |            |                  | 1.86    | 0.37           |             |
| <i>Lack of Fit</i>    | 1  | 0.96           | 0.96        | 7.53       | 0.0517           | 1.22    | 1.22           |             |
| <i>Pure Error</i>     | 4  | 0.51           | 0.13        |            |                  | 0.64    | 0.16           |             |
| Cor Total             | 25 | 5249.30        | 262.47      | 889.35     | < 0.0001         | 3849.37 |                |             |

**Table S5.** Statistical supplementary results of quadratic model.

|                          | <b>R% AO</b> |  | <b>R% MG</b> |
|--------------------------|--------------|--|--------------|
| <b>Std. Dev.</b>         | 0.54         |  | 0.61         |
| <b>Mean</b>              | 73.98        |  | 65.93        |
| <b>C.V. %</b>            | 0.73         |  | 0.92         |
| <b>PRESS</b>             | 543.16       |  | 688.15       |
| <b>-2 Log Likelihood</b> | -0.81        |  | 5.18         |
| <b>R-Squared</b>         | 0.9997       |  | 0.9995       |
| <b>Adj R-Squared</b>     | 0.9986       |  | 0.9976       |
| <b>Pred R-Squared</b>    | 0.8966       |  | 0.8212       |
| <b>Adeq Precision</b>    | 132.910      |  | 101.087      |
| <b>BIC</b>               | 67.61        |  | 73.60        |
| <b>AICc</b>              | 272.19       |  | 278.18       |
